# Supplementary material
Source: publisher figshare collection journal article supplement (https://acs.figshare.com/ndownloader/files/4602967)
Supplement: Supplementary file 1 [file 4602967]

data_W-ATE1-75E_publ

_publ_requested_journal          'Chemistry of Materials'

#=============================================================================
# this information describes the project, paper etc. for the CIF #
# Acta Cryst. Section C papers and editorial correspondence is generated #
# from the information in this section #    
# #          
# (from) CIF submission form for Rietveld refinements (Acta Cryst. C) #
# Version 14 December 1998 #      
#=============================================================================
# 1 SUBMISSION DETAILS        

_publ_contact_author_name        
'Steve Suib' # Name of author for correspondence    
_publ_contact_author_address     # Address of author for correspondence     
'55 North Eagleville Rd. Storrs, CT  06269'
_publ_contact_author_email       steven.suib@uconn.edu
_publ_contact_author_phone       (860)-486-2797
_publ_contact_author_fax         (860)-486-2981
loop_
_publ_author_name
_publ_author_address
'Suib, Steve' '55 North Eagleville Rd. Storrs, CT  06269'
'Calvert, Craig' '55 North Eagleville Rd. Storrs, CT  06269'
'Joesten, Raymond' '55 North Eagleville Rd. Storrs, CT  06269'

_pd_block_id                     
2007-03-15T00:01|W-ATE1-75E|Katana_Ngala|Scintag_XDS2000

_audit_creation_method           from
_audit_creation_date             2007-03-15T00:01
_audit_author_name               Katana
_audit_update_record             
; 2007-03-15T00:01 Initial CIF as created by GSAS2CIF    
;

_publ_contact_letter             
; ?          
;
_publ_requested_coeditor_name    ?
_publ_requested_category         ? # Acta C: one of CI/CM/CO/FI/FM/FO

#=============================================================================

# 2 PROCESSING SUMMARY (IUCr Office Use Only)

_journal_data_validation_number  ?

_journal_date_recd_electronic    ?
_journal_date_to_coeditor        ?
_journal_date_from_coeditor      ?
_journal_date_accepted           ?
_journal_date_printers_first     ?
_journal_date_printers_final     ?
_journal_date_proofs_out         ?
_journal_date_proofs_in          ?
_journal_coeditor_name           ?
_journal_coeditor_code           ?
_journal_coeditor_notes          
; ?
;
_journal_techeditor_code         ?
_journal_techeditor_notes        
; ?
;
_journal_coden_ASTM              ?
_journal_name_full               ?
_journal_year                    ?
_journal_volume                  ?
_journal_issue                   ?
_journal_page_first              ?
_journal_page_last               ?
_journal_paper_category          ?
_journal_suppl_publ_number       ?
_journal_suppl_publ_pages        ?

#============================================================================

# 3 TITLE AND AUTHOR LIST

_publ_section_title              
; ?    
;
_publ_section_title_footnote     
; ?           
;

# The loop structure below should contain the names and addresses of all
# authors, in the required order of publication. Repeat as necessary.  


_publ_author_footnote            ' _publ_author_address'
#<--'Last name, first name'       

#=============================================================================

# 4 TEXT      

_publ_section_synopsis           
; ?       
;
_publ_section_abstract           
; ?       
;
_publ_section_comment            
; ?       
;
_publ_section_exptl_prep         
# Details of the preparation of the sample(s)
# should be given here.   
; ?       
;
_publ_section_exptl_refinement   
; ?     
;
_publ_section_references         
; ?     
;
_publ_section_figure_captions    
; ?     
;
_publ_section_acknowledgements   
; ?     
;

#============================================================================
# 5 OVERALL REFINEMENT & COMPUTING DETAILS

_refine_special_details          
; ?         
;
_pd_proc_ls_special_details      
; ?         
;

# The following items are used to identify the programs used.
_computing_molecular_graphics    ?
_computing_publication_material  ?

_refine_ls_weighting_scheme      ?
_refine_ls_weighting_details     ?
_refine_ls_hydrogen_treatment    ?
_refine_ls_extinction_method     ?
_refine_ls_extinction_coef       ?
_refine_ls_number_constraints    ?

_refine_ls_restrained_S_all      ?
_refine_ls_restrained_S_obs      ?

#=============================================================================
# 6 SAMPLE PREPARATION DATA         

# (In the unusual case where multiple samples are used in a single 
# Rietveld study, this information should be moved into the phase   
# blocks)            

# The following three fields describe the preparation of the material.   
# The cooling rate is in K/min. The pressure at which the sample was
# prepared is in kPa. The temperature of preparation is in K.  

_pd_prep_cool_rate               ?
_pd_prep_pressure                ?
_pd_prep_temperature             ?

_pd_char_colour                  ? # use ICDD colour descriptions
_refine_ls_shift/su_max          0.06
_refine_ls_shift/su_mean         0.02
_computing_structure_refinement  GSAS
_refine_ls_number_parameters     10
_refine_ls_goodness_of_fit_all   1.85
_refine_ls_number_restraints     0
_refine_ls_matrix_type           full
#==============================================================================
# 7 CHEMICAL, STRUCTURAL AND CRYSTAL DATA

_pd_char_particle_morphology     ?

_chemical_name_systematic        
; ?    
;
_chemical_name_common            ?
_chemical_formula_moiety         ?
_chemical_formula_structural     ?
_chemical_formula_analytical     ?
_chemical_melting_point          ?
_chemical_compound_source        ? # for minerals and
# natural products  
_symmetry_space_group_name_Hall  ?

_exptl_crystal_F_000             ?
_exptl_crystal_density_diffrn    ?
_exptl_crystal_density_meas      ?
_exptl_crystal_density_method    ?

_cell_measurement_temperature    ?

_cell_special_details            
; ?        
;

_geom_special_details            ?

# The following item identifies the program(s) used (if appropriate).
_computing_structure_solution    ?

#==============================================================================

# 8 Phase information from GSAS

_pd_phase_name                   from
_cell_length_a                   9.80411(15)
_cell_length_b                   9.80411
_cell_length_c                   2.85201(5)
_cell_angle_alpha                90
_cell_angle_beta                 90
_cell_angle_gamma                90
_cell_volume                     274.137(9)
_symmetry_cell_setting           tetragonal
_symmetry_space_group_name_H-M   I
loop_
_symmetry_equiv_pos_site_id
_symmetry_equiv_pos_as_xyz
1 +x,+y,+z
2 -y,+x,+z
3 -x,-y,+z
4 +y,-x,+z
-1 -x,-y,-z
-2 +y,-x,-z
-3 +x,+y,-z
-4 -y,+x,-z
101 +x+1/2,+y+1/2,+z+1/2
102 -y+1/2,+x+1/2,+z+1/2
103 -x+1/2,-y+1/2,+z+1/2
104 +y+1/2,-x+1/2,+z+1/2
-101 -x+1/2,-y+1/2,-z+1/2
-102 +y+1/2,-x+1/2,-z+1/2
-103 +x+1/2,+y+1/2,-z+1/2
-104 -y+1/2,+x+1/2,-z+1/2

# ATOMIC COORDINATES AND DISPLACEMENT PARAMETERS


loop_
_atom_site_type_symbol
_atom_site_label
_atom_site_fract_x
_atom_site_fract_y
_atom_site_fract_z
_atom_site_occupancy
_atom_site_thermal_displace_type
_atom_site_U_iso_or_equiv
_atom_site_symmetry_multiplicity
K K1 0 0 0.5 0.50942 Uiso 0.025 2
Mn Mn1 0.35085 0.16902 0 0.98725 Uiso 0.025 8
O O1 0.54444 0.16525 0 1 Uiso 0.025 8
O O2 0.15676 0.19731 0 1 Uiso 0.025 8
W W 0.35085 0.16902 0 0.01275 Uiso 0.025 8

# If you change Z, be sure to change all 3 of the following
_chemical_formula_sum            K0.06
_chemical_formula_weight         46.78
_cell_formula_units_Z            16

# MOLECULAR GEOMETRY           

loop_
_geom_bond_atom_site_label_1
_geom_bond_atom_site_label_2
_geom_bond_distance
_geom_bond_site_symmetry_1
_geom_bond_site_symmetry_2
_geom_bond_publ_flag
K1 K1 2.85201(5) . 1_554 N
K1 K1 2.85201(5) . 1_556 N
K1 Mn1 4.07571(6) . 1_555 N
K1 Mn1 4.07571(6) . 1_556 N
K1 Mn1 4.07571(6) . 2_555 N
K1 Mn1 4.07571(6) . 2_556 N
K1 Mn1 4.07571(6) . 3_555 N
K1 Mn1 4.07571(6) . 3_556 N
K1 Mn1 4.07571(6) . 4_555 N
K1 Mn1 4.07571(6) . 4_556 N
K1 Mn1 3.55922(5) . 101_445 N
K1 Mn1 3.55922(5) . 102_545 N
K1 Mn1 3.55922(5) . 103_555 N
K1 Mn1 3.55922(5) . 104_455 N
K1 O1 3.31073(5) . 101_445 N
K1 O1 3.31073(5) . 102_545 N
K1 O1 3.31073(5) . 103_555 N
K1 O1 3.31073(5) . 104_455 N
K1 O2 2.852680(30) . 1_555 N
K1 O2 2.852680(30) . 1_556 N
K1 O2 2.852680(30) . 2_555 N
K1 O2 2.852680(30) . 2_556 N
K1 O2 2.852680(30) . 3_555 N
K1 O2 2.852680(30) . 3_556 N
K1 O2 2.852680(30) . 4_555 N
K1 O2 2.852680(30) . 4_556 N
K1 W 4.07571(6) . 1_555 N
K1 W 4.07571(6) . 1_556 N
K1 W 4.07571(6) . 2_555 N
K1 W 4.07571(6) . 2_556 N
K1 W 4.07571(6) . 3_555 N
K1 W 4.07571(6) . 3_556 N
K1 W 4.07571(6) . 4_555 N
K1 W 4.07571(6) . 4_556 N
K1 W 3.55922(5) . 101_445 N
K1 W 3.55922(5) . 102_545 N
K1 W 3.55922(5) . 103_555 N
K1 W 3.55922(5) . 104_455 N
Mn1 K1 4.07571(6) . 1_554 N
Mn1 K1 4.07571(6) . 1_555 N
Mn1 K1 3.55922(5) . 101_554 N
Mn1 Mn1 2.85201(5) . 1_554 N
Mn1 Mn1 2.85201(5) . 1_556 N
Mn1 Mn1 2.90949(4) . 103_554 N
Mn1 Mn1 2.90949(4) . 103_555 N
Mn1 O1 1.898350(30) . 1_555 N
Mn1 O1 1.884210(20) . 102_544 N
Mn1 O1 1.884210(20) . 102_545 N
Mn1 O2 1.922950(30) . 1_555 N
Mn1 O2 1.938150(20) . 103_554 N
Mn1 O2 1.938150(20) . 103_555 N
Mn1 W 2.85201(5) . 1_554 N
Mn1 W 2.85201(5) . 1_556 N
Mn1 W 2.90949(4) . 103_554 N
Mn1 W 2.90949(4) . 103_555 N
O1 K1 3.31073(5) . 101_554 N
O1 Mn1 1.898350(30) . 1_555 N
O1 Mn1 1.884210(20) . 104_554 N
O1 Mn1 1.884210(20) . 104_555 N
O1 W 1.898350(30) . 1_555 N
O1 W 1.884210(20) . 104_554 N
O1 W 1.884210(20) . 104_555 N
O2 K1 2.852680(30) . 1_554 N
O2 K1 2.852680(30) . 1_555 N
O2 Mn1 1.922950(30) . 1_555 N
O2 Mn1 1.938150(20) . 103_554 N
O2 Mn1 1.938150(20) . 103_555 N
O2 W 1.922950(30) . 1_555 N
O2 W 1.938150(20) . 103_554 N
O2 W 1.938150(20) . 103_555 N
W K1 4.07571(6) . 1_554 N
W K1 4.07571(6) . 1_555 N
W K1 3.55922(5) . 101_554 N
W Mn1 2.85201(5) . 1_554 N
W Mn1 2.85201(5) . 1_556 N
W Mn1 2.90949(4) . 103_554 N
W Mn1 2.90949(4) . 103_555 N
W O1 1.898350(30) . 1_555 N
W O1 1.884210(20) . 102_544 N
W O1 1.884210(20) . 102_545 N
W O2 1.922950(30) . 1_555 N
W O2 1.938150(20) . 103_554 N
W O2 1.938150(20) . 103_555 N
W W 2.85201(5) . 1_554 N
W W 2.85201(5) . 1_556 N
W W 2.90949(4) . 103_554 N
W W 2.90949(4) . 103_555 N

loop_
_geom_angle_atom_site_label_1
_geom_angle_atom_site_label_2
_geom_angle_atom_site_label_3
_geom_angle
_geom_angle_site_symmetry_1
_geom_angle_site_symmetry_2
_geom_angle_site_symmetry_3
_geom_angle_publ_flag
K1 K1 K1 180 1_554 . 1_556 N
K1 K1 Mn1 90 1_554 . 101_445 N
K1 K1 Mn1 90 1_554 . 102_545 N
K1 K1 Mn1 90 1_554 . 103_555 N
K1 K1 Mn1 90 1_554 . 104_455 N
K1 K1 O2 60.0078(6) 1_554 . 1_555 N
K1 K1 O2 119.9922(6) 1_554 . 1_556 N
K1 K1 O2 60.0078(6) 1_554 . 2_555 N
K1 K1 O2 119.9922(6) 1_554 . 2_556 N
K1 K1 O2 60.0078(6) 1_554 . 3_555 N
K1 K1 O2 119.9922(6) 1_554 . 3_556 N
K1 K1 O2 60.0078(6) 1_554 . 4_555 N
K1 K1 O2 119.9922(6) 1_554 . 4_556 N
K1 K1 W 90 1_554 . 101_445 N
K1 K1 W 90 1_554 . 102_545 N
K1 K1 W 90 1_554 . 103_555 N
K1 K1 W 90 1_554 . 104_455 N
K1 K1 Mn1 90 1_556 . 101_445 N
K1 K1 Mn1 90 1_556 . 102_545 N
K1 K1 Mn1 90 1_556 . 103_555 N
K1 K1 Mn1 90 1_556 . 104_455 N
K1 K1 O2 119.9922(6) 1_556 . 1_555 N
K1 K1 O2 60.0078(6) 1_556 . 1_556 N
K1 K1 O2 119.9922(6) 1_556 . 2_555 N
K1 K1 O2 60.0078(6) 1_556 . 2_556 N
K1 K1 O2 119.9922(6) 1_556 . 3_555 N
K1 K1 O2 60.0078(6) 1_556 . 3_556 N
K1 K1 O2 119.9922(6) 1_556 . 4_555 N
K1 K1 O2 60.0078(6) 1_556 . 4_556 N
K1 K1 W 90 1_556 . 101_445 N
K1 K1 W 90 1_556 . 102_545 N
K1 K1 W 90 1_556 . 103_555 N
K1 K1 W 90 1_556 . 104_455 N
Mn1 K1 Mn1 90 101_445 . 102_545 N
Mn1 K1 Mn1 179.9802 101_445 . 103_555 N
Mn1 K1 Mn1 90 101_445 . 104_455 N
Mn1 K1 O2 147.0976(5) 101_445 . 1_555 N
Mn1 K1 O2 147.0976(5) 101_445 . 1_556 N
Mn1 K1 O2 102.27410(10) 101_445 . 2_555 N
Mn1 K1 O2 102.27410(10) 101_445 . 2_556 N
Mn1 K1 O2 32.9024(5) 101_445 . 3_555 N
Mn1 K1 O2 32.9024(5) 101_445 . 3_556 N
Mn1 K1 O2 77.72590(10) 101_445 . 4_555 N
Mn1 K1 O2 77.72590(10) 101_445 . 4_556 N
Mn1 K1 W 0 101_445 . 101_445 N
Mn1 K1 W 90 101_445 . 102_545 N
Mn1 K1 W 179.9802 101_445 . 103_555 N
Mn1 K1 W 90 101_445 . 104_455 N
Mn1 K1 Mn1 90 102_545 . 103_555 N
Mn1 K1 Mn1 180 102_545 . 104_455 N
Mn1 K1 O2 77.72590(10) 102_545 . 1_555 N
Mn1 K1 O2 77.72590(10) 102_545 . 1_556 N
Mn1 K1 O2 147.0976(5) 102_545 . 2_555 N
Mn1 K1 O2 147.0976(5) 102_545 . 2_556 N
Mn1 K1 O2 102.27410(10) 102_545 . 3_555 N
Mn1 K1 O2 102.27410(10) 102_545 . 3_556 N
Mn1 K1 O2 32.9024(5) 102_545 . 4_555 N
Mn1 K1 O2 32.9024(5) 102_545 . 4_556 N
Mn1 K1 W 90 102_545 . 101_445 N
Mn1 K1 W 0 102_545 . 102_545 N
Mn1 K1 W 90 102_545 . 103_555 N
Mn1 K1 W 180 102_545 . 104_455 N
Mn1 K1 Mn1 90 103_555 . 104_455 N
Mn1 K1 O2 32.9024(5) 103_555 . 1_555 N
Mn1 K1 O2 32.9024(5) 103_555 . 1_556 N
Mn1 K1 O2 77.72590(10) 103_555 . 2_555 N
Mn1 K1 O2 77.72590(10) 103_555 . 2_556 N
Mn1 K1 O2 147.0976(5) 103_555 . 3_555 N
Mn1 K1 O2 147.0976(5) 103_555 . 3_556 N
Mn1 K1 O2 102.27410(10) 103_555 . 4_555 N
Mn1 K1 O2 102.27410(10) 103_555 . 4_556 N
Mn1 K1 W 179.9802 103_555 . 101_445 N
Mn1 K1 W 90 103_555 . 102_545 N
Mn1 K1 W 0 103_555 . 103_555 N
Mn1 K1 W 90 103_555 . 104_455 N
Mn1 K1 O2 102.27410(10) 104_455 . 1_555 N
Mn1 K1 O2 102.27410(10) 104_455 . 1_556 N
Mn1 K1 O2 32.9024(5) 104_455 . 2_555 N
Mn1 K1 O2 32.9024(5) 104_455 . 2_556 N
Mn1 K1 O2 77.72590(10) 104_455 . 3_555 N
Mn1 K1 O2 77.72590(10) 104_455 . 3_556 N
Mn1 K1 O2 147.0976(5) 104_455 . 4_555 N
Mn1 K1 O2 147.0976(5) 104_455 . 4_556 N
Mn1 K1 W 90 104_455 . 101_445 N
Mn1 K1 W 180 104_455 . 102_545 N
Mn1 K1 W 90 104_455 . 103_555 N
Mn1 K1 W 0 104_455 . 104_455 N
O2 K1 O2 59.9845(11) 1_555 . 1_556 N
O2 K1 O2 75.5294(5) 1_555 . 2_555 N
O2 K1 O2 104.4706(5) 1_555 . 2_556 N
O2 K1 O2 120.0155(11) 1_555 . 3_555 N
O2 K1 O2 180 1_555 . 3_556 N
O2 K1 O2 75.5294(5) 1_555 . 4_555 N
O2 K1 O2 104.4706(5) 1_555 . 4_556 N
O2 K1 W 147.0976(5) 1_555 . 101_445 N
O2 K1 W 77.72590(10) 1_555 . 102_545 N
O2 K1 W 32.9024(5) 1_555 . 103_555 N
O2 K1 W 102.27410(10) 1_555 . 104_455 N
O2 K1 O2 104.4706(5) 1_556 . 2_555 N
O2 K1 O2 75.5294(5) 1_556 . 2_556 N
O2 K1 O2 179.9802 1_556 . 3_555 N
O2 K1 O2 120.0155(11) 1_556 . 3_556 N
O2 K1 O2 104.4706(5) 1_556 . 4_555 N
O2 K1 O2 75.5294(5) 1_556 . 4_556 N
O2 K1 W 147.0976(5) 1_556 . 101_445 N
O2 K1 W 77.72590(10) 1_556 . 102_545 N
O2 K1 W 32.9024(5) 1_556 . 103_555 N
O2 K1 W 102.27410(10) 1_556 . 104_455 N
O2 K1 O2 59.9845(11) 2_555 . 2_556 N
O2 K1 O2 75.5294(5) 2_555 . 3_555 N
O2 K1 O2 104.4706(5) 2_555 . 3_556 N
O2 K1 O2 120.0155(11) 2_555 . 4_555 N
O2 K1 O2 179.972 2_555 . 4_556 N
O2 K1 W 102.27410(10) 2_555 . 101_445 N
O2 K1 W 147.0976(5) 2_555 . 102_545 N
O2 K1 W 77.72590(10) 2_555 . 103_555 N
O2 K1 W 32.9024(5) 2_555 . 104_455 N
O2 K1 O2 104.4706(5) 2_556 . 3_555 N
O2 K1 O2 75.5294(5) 2_556 . 3_556 N
O2 K1 O2 179.972 2_556 . 4_555 N
O2 K1 O2 120.0155(11) 2_556 . 4_556 N
O2 K1 W 102.27410(10) 2_556 . 101_445 N
O2 K1 W 147.0976(5) 2_556 . 102_545 N
O2 K1 W 77.72590(10) 2_556 . 103_555 N
O2 K1 W 32.9024(5) 2_556 . 104_455 N
O2 K1 O2 59.9845(11) 3_555 . 3_556 N
O2 K1 O2 75.5294(5) 3_555 . 4_555 N
O2 K1 O2 104.4706(5) 3_555 . 4_556 N
O2 K1 W 32.9024(5) 3_555 . 101_445 N
O2 K1 W 102.27410(10) 3_555 . 102_545 N
O2 K1 W 147.0976(5) 3_555 . 103_555 N
O2 K1 W 77.72590(10) 3_555 . 104_455 N
O2 K1 O2 104.4706(5) 3_556 . 4_555 N
O2 K1 O2 75.5294(5) 3_556 . 4_556 N
O2 K1 W 32.9024(5) 3_556 . 101_445 N
O2 K1 W 102.27410(10) 3_556 . 102_545 N
O2 K1 W 147.0976(5) 3_556 . 103_555 N
O2 K1 W 77.72590(10) 3_556 . 104_455 N
O2 K1 O2 59.9845(11) 4_555 . 4_556 N
O2 K1 W 77.72590(10) 4_555 . 101_445 N
O2 K1 W 32.9024(5) 4_555 . 102_545 N
O2 K1 W 102.27410(10) 4_555 . 103_555 N
O2 K1 W 147.0976(5) 4_555 . 104_455 N
O2 K1 W 77.72590(10) 4_556 . 101_445 N
O2 K1 W 32.9024(5) 4_556 . 102_545 N
O2 K1 W 102.27410(10) 4_556 . 103_555 N
O2 K1 W 147.0976(5) 4_556 . 104_455 N
W K1 W 90 101_445 . 102_545 N
W K1 W 179.9802 101_445 . 103_555 N
W K1 W 90 101_445 . 104_455 N
W K1 W 90 102_545 . 103_555 N
W K1 W 180 102_545 . 104_455 N
W K1 W 90 103_555 . 104_455 N
K1 Mn1 O1 66.8582 101_554 . 1_555 N
K1 Mn1 O1 128.7123(6) 101_554 . 102_544 N
K1 Mn1 O1 128.7123(6) 101_554 . 102_545 N
K1 Mn1 O2 105.9647 101_554 . 1_555 N
K1 Mn1 O2 53.0849(5) 101_554 . 103_554 N
K1 Mn1 O2 53.0849(5) 101_554 . 103_555 N
O1 Mn1 O1 94.07830(10) 1_555 . 102_544 N
O1 Mn1 O1 94.07830(10) 1_555 . 102_545 N
O1 Mn1 O2 172.8228 1_555 . 1_555 N
O1 Mn1 O2 92.9618 1_555 . 103_554 N
O1 Mn1 O2 92.9618 1_555 . 103_555 N
O1 Mn1 O1 98.3694(13) 102_544 . 102_545 N
O1 Mn1 O2 90.6082 102_544 . 1_555 N
O1 Mn1 O2 83.0066(13) 102_544 . 103_554 N
O1 Mn1 O2 172.70860(10) 102_544 . 103_555 N
O1 Mn1 O2 90.6082 102_545 . 1_555 N
O1 Mn1 O2 172.70869(10) 102_545 . 103_554 N
O1 Mn1 O2 83.0066(13) 102_545 . 103_555 N
O2 Mn1 O2 82.20490(10) 1_555 . 103_554 N
O2 Mn1 O2 82.20490(10) 1_555 . 103_555 N
O2 Mn1 O2 94.7421(13) 103_554 . 103_555 N
Mn1 O1 Mn1 130.5222(6) 1_555 . 104_554 N
Mn1 O1 Mn1 130.5222(6) 1_555 . 104_555 N
Mn1 O1 W 0 1_555 . 1_555 N
Mn1 O1 W 130.5222(6) 1_555 . 104_554 N
Mn1 O1 W 130.5222(6) 1_555 . 104_555 N
Mn1 O1 Mn1 98.3693(13) 104_554 . 104_555 N
Mn1 O1 W 130.5222(6) 104_554 . 1_555 N
Mn1 O1 W 0 104_554 . 104_554 N
Mn1 O1 W 98.3693(13) 104_554 . 104_555 N
Mn1 O1 W 130.5222(6) 104_555 . 1_555 N
Mn1 O1 W 98.3693(13) 104_555 . 104_554 N
Mn1 O1 W 0 104_555 . 104_555 N
W O1 W 130.5222(6) 1_555 . 104_554 N
W O1 W 130.5222(6) 1_555 . 104_555 N
W O1 W 98.3693(13) 104_554 . 104_555 N
K1 O2 K1 59.9845(11) 1_554 . 1_555 N
K1 O2 Mn1 115.80540(20) 1_554 . 1_555 N
K1 O2 Mn1 94.0127(10) 1_554 . 103_554 N
K1 O2 Mn1 143.66440(20) 1_554 . 103_555 N
K1 O2 W 115.80540(20) 1_554 . 1_555 N
K1 O2 W 94.0127(10) 1_554 . 103_554 N
K1 O2 W 143.66440(20) 1_554 . 103_555 N
K1 O2 Mn1 115.80550(20) 1_555 . 1_555 N
K1 O2 Mn1 143.66440(20) 1_555 . 103_554 N
K1 O2 Mn1 94.0127(10) 1_555 . 103_555 N
K1 O2 W 115.80550(20) 1_555 . 1_555 N
K1 O2 W 143.66440(20) 1_555 . 103_554 N
K1 O2 W 94.0127(10) 1_555 . 103_555 N
Mn1 O2 Mn1 97.79510(10) 1_555 . 103_554 N
Mn1 O2 Mn1 97.79510(10) 1_555 . 103_555 N
Mn1 O2 W 0 1_555 . 1_555 N
Mn1 O2 W 97.79510(10) 1_555 . 103_554 N
Mn1 O2 W 97.79510(10) 1_555 . 103_555 N
Mn1 O2 Mn1 94.7421(13) 103_554 . 103_555 N
Mn1 O2 W 97.79510(10) 103_554 . 1_555 N
Mn1 O2 W 0 103_554 . 103_554 N
Mn1 O2 W 94.7421(13) 103_554 . 103_555 N
Mn1 O2 W 97.79510(10) 103_555 . 1_555 N
Mn1 O2 W 94.7421(13) 103_555 . 103_554 N
Mn1 O2 W 0 103_555 . 103_555 N
W O2 W 97.79510(10) 1_555 . 103_554 N
W O2 W 97.79510(10) 1_555 . 103_555 N
W O2 W 94.7421(13) 103_554 . 103_555 N
K1 W O1 66.8582 101_554 . 1_555 N
K1 W O1 128.7123(6) 101_554 . 102_544 N
K1 W O1 128.7123(6) 101_554 . 102_545 N
K1 W O2 105.9647 101_554 . 1_555 N
K1 W O2 53.0849(5) 101_554 . 103_554 N
K1 W O2 53.0849(5) 101_554 . 103_555 N
O1 W O1 94.07830(10) 1_555 . 102_544 N
O1 W O1 94.07830(10) 1_555 . 102_545 N
O1 W O2 172.8228 1_555 . 1_555 N
O1 W O2 92.9618 1_555 . 103_554 N
O1 W O2 92.9618 1_555 . 103_555 N
O1 W O1 98.3694(13) 102_544 . 102_545 N
O1 W O2 90.6082 102_544 . 1_555 N
O1 W O2 83.0066(13) 102_544 . 103_554 N
O1 W O2 172.70860(10) 102_544 . 103_555 N
O1 W O2 90.6082 102_545 . 1_555 N
O1 W O2 172.70869(10) 102_545 . 103_554 N
O1 W O2 83.0066(13) 102_545 . 103_555 N
O2 W O2 82.20490(10) 1_555 . 103_554 N
O2 W O2 82.20490(10) 1_555 . 103_555 N
O2 W O2 94.7421(13) 103_554 . 103_555 N

# Powder diffraction data for histogram 1      
#=============================================================================
# 9 INSTRUMENT CHARACTERIZATION         

_exptl_special_details           
; ?           
;

# if regions of the data are excluded, the reason(s) are supplied here:
_pd_proc_info_excluded_regions   
; ?           
;

# The following item is used to identify the equipment used to record
# the powder pattern when the diffractogram was measured at a laboratory 
# other than the authors' home institution, e.g. when neutron or synchrotron 
# radiation is used.         

_pd_instr_location               
; ?           
;
_pd_calibration_special_details  
# description of the method used      
# to calibrate the instrument       
; ?           
;

_diffrn_ambient_temperature      ?
_diffrn_source                   ?
_diffrn_source_target            ?
_diffrn_source_type              ?
_diffrn_measurement_device_type  ?
_diffrn_detector                 ?
_diffrn_detector_type            ? # make or model of detector   

_pd_meas_scan_method             ? # options are 'step', 'cont',    
# 'tof', 'fixed' or      
# 'disp' (= dispersive)      
_pd_meas_special_details         
; ?         
;

# The following two items identify the program(s) used (if appropriate).
_computing_data_collection       ?
_computing_data_reduction        ?

# Describe any processing performed on the data, prior to refinement.  
# For example: a manual Lp correction or a precomputed absorption correction 
_pd_proc_info_data_reduction     ?

# The following item is used for angular dispersive measurements only.  

_diffrn_radiation_monochromator  ?

# The following items are used to define the size of the instrument.
# Not all distances are appropriate for all instrument types.   

_pd_instr_dist_src/mono          ?
_pd_instr_dist_mono/spec         ?
_pd_instr_dist_src/spec          ?
_pd_instr_dist_spec/anal         ?
_pd_instr_dist_anal/detc         ?
_pd_instr_dist_spec/detc         ?

# 10 Specimen size and mounting information      

# The next three fields give the specimen dimensions in mm. The equatorial
# plane contains the incident and diffracted beam.     

_pd_spec_size_axial              ? # perpendicular to        
# equatorial plane         

_pd_spec_size_equat              ? # parallel to        
# scattering vector         
# in transmission         

_pd_spec_size_thick              ? # parallel to   
# scattering vector    
# in reflection    

_pd_spec_mounting                
# This field should be  
# used to give details of the
# container.     
; ?      
;

_pd_spec_mount_mode              ? # options are 'reflection'  
# or 'transmission'    

_pd_spec_shape                   ? # options are 'cylinder'  
# 'flat_sheet' or 'irregular'   


loop_
_atom_type_symbol
_atom_type_number_in_cell
_atom_type_scat_dispersion_real
_atom_type_scat_dispersion_imag
_atom_type_scat_Cromer_Mann_a1
_atom_type_scat_Cromer_Mann_a2
_atom_type_scat_Cromer_Mann_a3
_atom_type_scat_Cromer_Mann_a4
_atom_type_scat_Cromer_Mann_b1
_atom_type_scat_Cromer_Mann_b2
_atom_type_scat_Cromer_Mann_b3
_atom_type_scat_Cromer_Mann_b4
_atom_type_scat_Cromer_Mann_c
_atom_type_scat_source
K 1.019 0 0 8.2186 12.7949 7.4398 0.7748 1.0519 213.187 0.8659 41.6841 1.4228
International_Tables_Vol_C
Mn 7.898 0 0 11.2819 5.3409 7.3573 0.3432 3.0193 17.8674 2.2441 83.7543 1.0896
International_Tables_Vol_C
O 16 0 0 3.0485 13.2771 2.2868 5.7011 1.5463 0.3239 0.867 32.9089 0.2508
International_Tables_Vol_C
W 0.102 0 0 29.0818 1.72029 15.43 9.2259 14.4327 0.3217 5.11982 57.056 9.8875
International_Tables_Vol_C
_diffrn_radiation_probe          x-ray
_diffrn_radiation_polarisn_ratio 0.5

loop_
_diffrn_radiation_wavelength
_diffrn_radiation_wavelength_wt
_diffrn_radiation_type
_diffrn_radiation_wavelength_id
1.5406 1 CuK\a~1~ 1
1.5444 0.5 CuK\a~2~ 2
_pd_proc_ls_prof_R_factor        0.0394
_pd_proc_ls_prof_wR_factor       0.0532
_pd_proc_ls_prof_wR_expected     0.0288
_refine_ls_R_Fsqd_factor         0.06417

_pd_proc_ls_background_function  
; GSAS Background function number 1 with 6 terms.
 Shifted Chebyshev function of 1st kind  
 1:00 982.335 2:00 -1190 3:00 759.979 4:00 -423.745
 5:00 171.821 6:00 -34.6233    
;

_exptl_absorpt_process_details   
; GSAS Absorption/surface roughness correction: function number 3 
 Surface roughness abs. correction (Suortti)   
Terms = 0.10778 0.7     
Correction is not refined.     
;
_exptl_absorpt_correction_T_min  0.19863
_exptl_absorpt_correction_T_max  0.74695
# Extinction correction      


_pd_proc_ls_profile_function     
;        
 CW Profile function number 2 with 18 terms
 Profile coefficients for Simpson's rule integration of pseudovoigt function    
 C.J. Howard (1982). J. Appl. Cryst.,15,615-620.       
 P. Thompson, D.E. Cox & J.B. Hastings (1987). J. Appl. Cryst.,20,79-83.  
 #1(GU) = 56.317 #2(GV) = -0.957 #3(GW) = 8.479    
 #4(LX) = 21.475 #5(LY) = 27.441 #6(trns) = 0    
 #7(asym) = -4.4816 #8(shft) = 0.5512 #9(GP) = 0    
 #10(stec)= -21.53 #11(ptec)= -9.69 #12(sfec)= 0       
 #13(L11) = 0.088 #14(L22) = 0 #15(L33) = 0    
 #16(L12) = -0.03 #17(L13) = 0 #18(L23) = 0    
 Peak tails are ignored where the intensity is below 0.005 times the peak
 Aniso. broadening axis 0 0 1       
;
_pd_proc_ls_peak_cutoff          0.005
_pd_proc_info_datetime           2007-03-15T00:01:28
_pd_calc_method                  Rietveld

#---- raw/calc data loop -----
_pd_meas_2theta_range_min        5
_pd_meas_2theta_range_max        80
_pd_meas_2theta_range_inc        0.02
_pd_proc_2theta_range_min        5
_pd_proc_2theta_range_max        80
_pd_proc_2theta_range_inc        0.02


_pd_meas_number_of_points        3751
_pd_proc_number_of_points        3751

loop_
_refln_index_h
_refln_index_k
_refln_index_l
_pd_refln_wavelength_id
_refln_observed_status
_refln_F_squared_meas
_refln_F_squared_calc
_refln_phase_calc
_refln_d_spacing
_gsas_i100_meas
2 2 0 1 o 1043.144 1280.8 0 3.46628 8.38
2 2 0 2 o 1088.022 1280.8 0 3.46628 4.36
3 1 0 1 o 4926.337 4753.088 0 3.10033 33.84
3 1 0 2 o 4903.023 4753.088 0 3.10033 16.79
1 3 0 1 o 14664.762 14289.847 0 3.10033 100
1 3 0 2 o 14674.683 14289.847 0 3.10033 49.88
0 1 1 1 o 35.91 146.875 180 2.7385 0.5
0 1 1 2 o 50.543 146.875 180 2.7385 0.34
0 4 0 1 o 8303.405 7971.748 180 2.45103 41.69
0 4 0 2 o 8414.11 7971.748 180 2.45103 21.07
2 1 1 1 o 8275.281 8456.508 0 2.39074 79.6
2 1 1 2 o 8137.762 8456.508 0 2.39074 38.98
1 2 1 1 o 6303.266 6450.042 180 2.39074 62.05
1 2 1 2 o 6207.958 6450.042 180 2.39074 30.44
3 3 0 1 o 3567.227 3668.358 180 2.31085 16.25
3 3 0 2 o 3516.706 3668.358 180 2.31085 7.98
4 2 0 1 o 1630.46 1545.951 0 2.19227 7.26
4 2 0 2 o 1620.019 1545.951 0 2.19227 3.59
2 4 0 1 o 2971.304 2778.174 0 2.19227 13.74
2 4 0 2 o 2942.096 2778.174 0 2.19227 6.78
0 3 1 1 o 6642.446 6230.052 180 2.14881 60.51
0 3 1 2 o 6795.508 6230.052 180 2.14881 30.84
5 1 0 1 o 1500.043 1360.11 0 1.92274 6.04
5 1 0 2 o 1521.872 1360.11 0 1.92274 3.05
3 2 1 1 o 676.699 756.624 180 1.96803 5.31
3 2 1 2 o 676.516 756.624 180 1.96803 2.64
2 3 1 1 o -0.016 0.021 0 1.96803 0
2 3 1 2 o -0.015 0.021 0 1.96803 0
1 5 0 1 o 2997.169 2704.91 180 1.92274 11.17
1 5 0 2 o 3050.045 2704.91 180 1.92274 5.67
4 1 1 1 o 7998.768 8227.59 180 1.82634 55.64
4 1 1 2 o 7992.424 8227.59 180 1.82634 27.7
1 4 1 1 o 5314.639 5475.505 0 1.82634 36.33
1 4 1 2 o 5345.885 5475.505 0 1.82634 18.21
4 4 0 1 o 1326.14 1580.16 0 1.73314 4.28
4 4 0 2 o 1339.674 1580.16 0 1.73314 2.16
5 3 0 1 o 15.378 16.803 0 1.68139 0.06
5 3 0 2 o 15.523 16.803 0 1.68139 0.03
3 5 0 1 o 1128.408 1205.899 0 1.68139 3.49
3 5 0 2 o 1135.439 1205.899 0 1.68139 1.75
0 6 0 1 o 19393.844 18137.6 0 1.63402 57.73
0 6 0 2 o 19575.371 18137.6 0 1.63402 29.04
0 5 1 1 o 1764.116 1748.705 0 1.61578 10.09
3 4 1 1 o 848.86 840.532 0 1.61578 4.72
4 3 1 1 o 3.41 3.371 0 1.61578 0.01
4 3 1 2 o 3.521 3.371 0 1.61578 0.01
3 4 1 2 o 895.815 840.532 0 1.61578 2.49
0 5 1 2 o 1864.565 1748.705 0 1.61578 5.32
6 2 0 1 o 3251.392 3169.609 180 1.55017 8.61
6 2 0 2 o 3243.594 3169.609 180 1.55017 4.28
2 6 0 1 o 1.665 1.602 0 1.55017 0.01
2 6 0 2 o 1.678 1.602 0 1.55017 0
5 2 1 1 o 5491.348 5630.633 0 1.53457 28.85
5 2 1 2 o 5463.732 5630.633 0 1.53457 14.29
2 5 1 1 o 12281.862 12654.046 180 1.53457 66.02
2 5 1 2 o 12292.44 12654.046 180 1.53457 32.92
7 1 0 1 o 0.746 0.582 180 1.38651 0
7 1 0 2 o 0.792 0.582 180 1.38651 0
6 1 1 1 o 1677.921 1652.98 180 1.40321 7.98
0 0 2 1 o 20990.129 20906.93 0 1.42601 25.43
6 1 1 2 o 1722.368 1652.98 180 1.40321 4.08
0 0 2 2 o 20596.15 20906.93 0 1.42601 12.42
1 6 1 1 o 15.639 15.612 180 1.40321 0.12
1 7 0 1 o 3838.059 3346.965 180 1.38651 8.7
5 5 0 1 o 159.869 137.36 0 1.38651 0.4
1 6 1 2 o 16.557 15.612 180 1.40321 0.06
1 7 0 2 o 4001.221 3346.965 180 1.38651 4.53
5 5 0 2 o 167.102 137.36 0 1.38651 0.21
6 4 0 1 o 256.027 237.378 180 1.35959 0.54
1 1 2 1 o 690.997 623.627 180 1.39676 3.11
6 4 0 2 o 254.903 237.378 180 1.35959 0.27
1 1 2 2 o 696.377 623.627 180 1.39676 1.56
4 6 0 1 o 4387.196 4055.031 180 1.35959 9.56
4 6 0 2 o 4376.781 4055.031 180 1.35959 4.75
5 4 1 1 o 13589.562 13472.259 180 1.34903 60.52
0 2 2 1 o 1604.157 1391.556 180 1.36925 7.09
5 4 1 2 o 13112.224 13472.259 180 1.34903 29.07
0 2 2 2 o 1545.065 1391.556 180 1.36925 3.4
4 5 1 1 o 2835.097 2813.17 0 1.34903 12.39
4 5 1 2 o 2735.566 2813.17 0 1.34903 5.95
7 3 0 1 o 4614.41 4458.456 0 1.28734 9.53
7 3 0 2 o 4681.756 4458.456 0 1.28734 4.82
2 2 2 1 o 337.153 340.877 0 1.31877 1.49
6 3 1 1 o 217.192 222.119 180 1.30067 1.06
3 7 0 1 o 2048.215 1971.047 0 1.28734 4.26
2 2 2 2 o 332.347 340.877 0 1.31877 0.73
6 3 1 2 o 212.852 222.119 180 1.30067 0.52
3 7 0 2 o 2086.139 1971.047 0 1.28734 2.16
3 6 1 1 o 362.126 370.279 180 1.30067 1.69
3 6 1 2 o 353.946 370.279 180 1.30067 0.82
3 1 2 1 o 1233.948 1284.661 0 1.29554 5.21
1 3 2 1 o 3705.858 3860.379 0 1.29554 15.47
3 1 2 2 o 1268.23 1284.661 0 1.29554 2.67
1 3 2 2 o 3809.843 3860.379 0 1.29554 7.93
0 7 1 1 o 284.854 391.509 180 1.25717 1.16
0 7 1 2 o 322.09 391.509 180 1.25717 0.66
0 8 0 1 o 379.07 383.006 180 1.22551 0.73
0 8 0 2 o 386.024 383.006 180 1.22551 0.37
7 2 1 1 o 492.348 469.378 180 1.21776 1.93
7 2 1 2 o 502.293 469.378 180 1.21776 0.98
0 4 2 1 o 2189.487 2211.62 180 1.23258 8.33
2 7 1 1 o 1399.104 1334.162 0 1.21776 5.22
0 4 2 2 o 2206.576 2211.62 180 1.23258 4.19
2 7 1 2 o 1430.835 1334.162 0 1.21776 2.66
3 3 2 1 o 1754.44 1602.325 180 1.21354 6.58
3 3 2 2 o 1714.643 1602.325 180 1.21354 3.2
_reflns_number_total             106
_reflns_limit_h_min              0
_reflns_limit_h_max              8
_reflns_limit_k_min              0
_reflns_limit_k_max              8
_reflns_limit_l_min              0
_reflns_limit_l_max              2
_reflns_d_resolution_high        1.214
_reflns_d_resolution_low         3.466

#--eof--eof--eof--eof--eof--eof--eof--eof--eof--eof--eof--eof--eof--eof--eof--# 
